# Supplementary material for: Mutations in ARSB in MPS VI patients in India
Source: PubMed Central journal article supplement — Mol Genet Metab Rep. 2015 Jul 17;4:53–61. doi: 10.1016/j.ymgmr.2015.06.002 (PMC4750586; doi:10.1016/j.ymgmr.2015.06.002), 2015-07-17
Supplement: mmc1.pdf [file mmc1.pdf]

Table S1.

Summary of clinical manifestations in MPS VI patients. All patients except P7 had short stature, coarse facies, dolichocephaly, corneal clouding, hirsutism, pectus carinatum and brachydactyly.

| Particulars                                    | Patient ID                       |               |                                   |                    |                     |                                                                 |                                                            |                            |                                |
|------------------------------------------------|----------------------------------|---------------|-----------------------------------|--------------------|---------------------|-----------------------------------------------------------------|------------------------------------------------------------|----------------------------|--------------------------------|
|                                                | P1                               | P2            | P3                                | P5                 | P6                  | P7 <sup>1</sup>                                                 | P8                                                         | P9                         | P10                            |
| <b>Family ID</b>                               | F1                               | F2            | F3                                | F5                 | F6                  | F6                                                              | F7                                                         | F8                         | F9                             |
| <b>Mutation<sup>2</sup></b>                    | p.W450C/?                        | <b>p.L98R</b> | p.W450C                           | p.D53N             | <b>p.R315P</b>      | <b>p.R315P</b>                                                  | p.R160Q                                                    | <b>p.C91R</b>              | <b>p.G38_G40del3</b>           |
| <b>Present age (years)</b>                     | 18                               | 7             | 19                                | 6                  | 4                   | 2                                                               | 15                                                         | Expired at 10 years of age | 7                              |
| <b>Extent of severity</b>                      | Moderate                         | Attenuated    | Attenuated                        | Moderate           | Moderate            | NA                                                              | Moderate                                                   | Severe                     | Attenuated                     |
| <b>Parental consanguinity</b>                  | No                               | No            | Yes                               | Yes                | Yes                 | Yes                                                             | Yes                                                        | Yes                        | Yes                            |
| <b>Other affected members</b>                  | None                             | None          | None                              | None               | Younger sister (P7) | Elder Sister (P6)                                               | None                                                       | Younger brother            | Cousin                         |
| <b>Gender</b>                                  | Male                             | Female        | Female                            | Male               | Female              | Female                                                          | Male                                                       | Male                       | Female                         |
| <b>Age of onset</b>                            | 3 years                          | 2 years       | 5 years                           | 5 months           | 9 months            | NA                                                              | 3 years                                                    | 9 months                   | 18 months                      |
| <b>Presenting feature(s)</b>                   | Pectus carinatum, dolichocephaly | Short stature | Coarse facies, skeletal deformity | Delayed milestones | Kyphoscoliosis      | Extensive Mongolian spots. Not yet developed clinical symptoms. | Large head, poor growth, corneal clouding, noisy breathing | Gibbus, inguinal hernia    | Pectus carinatum, macrocephaly |
| <b>Age at diagnosis (years)</b>                | 6                                | 3             | 6                                 | 1                  | 3                   | 1                                                               | 14                                                         | 7                          | 4                              |
| <b>Age at last clinical evaluation (years)</b> | 16                               | 5             | 18                                | 5                  | 3                   | NA                                                              | 15                                                         | 7                          | 7                              |

| Particulars                 | Patient ID |        |                               |        |        |                 |        |        |                                                                                    |
|-----------------------------|------------|--------|-------------------------------|--------|--------|-----------------|--------|--------|------------------------------------------------------------------------------------|
|                             | P1         | P2     | P3                            | P5     | P6     | P7 <sup>1</sup> | P8     | P9     | P10                                                                                |
| <b>Short stature</b>        | Yes        | Yes    | Yes                           | Yes    | Yes    | NA              | Yes    | Yes    | Yes                                                                                |
| <b>Coarse facies</b>        | Yes        | Yes    | Yes                           | Yes    | Yes    | NA              | Yes    | Yes    | Yes                                                                                |
| <b>Ambulation</b>           | Yes        | Yes    | Yes                           | Yes    | Yes    | NA              | Yes    | Yes    | Yes                                                                                |
| <b>Abnormal gait</b>        | Yes        | No     | Yes                           | No     | No     | NA              | No     | Yes    | Yes                                                                                |
| <b>Dolichocephaly</b>       | Yes        | Yes    | Yes                           | Yes    | Yes    | NA              | Yes    | Yes    | Yes                                                                                |
| <b>Frontal bossing</b>      | No         | Yes    | No                            | No     | No     | NA              | No     | Yes    | No                                                                                 |
| <b>Brain (MRI findings)</b> | NE         | No     | Mild diffuse cerebral atrophy | NE     | NE     | NA              | NE     | NE     | Diffuse cerebral atrophy,<br>Left temporal arachnoid cyst,<br>white matter disease |
| <b>Intelligence</b>         | Normal     | Normal | Normal                        | Normal | Normal | NA              | Normal | Normal | Normal                                                                             |
| <b>Cognition</b>            | Normal     | Normal | Normal                        | Normal | Normal | NA              | Normal | Normal | Normal                                                                             |

| Particulars                 | Patient ID |        |                                                                                                                                  |                           |                           |                                        |                                               |                                           |                               |     |
|-----------------------------|------------|--------|----------------------------------------------------------------------------------------------------------------------------------|---------------------------|---------------------------|----------------------------------------|-----------------------------------------------|-------------------------------------------|-------------------------------|-----|
|                             | P1         | P2     | P3                                                                                                                               | P5                        | P6                        | P7 <sup>1</sup>                        | P8                                            | P9                                        | P10                           |     |
| <b>Surgery undergone</b>    | None       | None   | Tonsillo-adenoidectomy, Ventriculo-stomy, Bilateral supra-condylar osteotomy, Atlanto axial decompression, Carpel tunnel release | Bilateral inguinal hernia | None                      | NA                                     | None                                          | Inguinal hernia, tracheostomy             | None                          |     |
| <b>Hirsutism</b>            | Yes        | Yes    | Yes                                                                                                                              | Yes                       | Yes                       | Yes                                    | Yes                                           | Yes                                       | Yes                           |     |
| <b>Corneal clouding</b>     | Yes        | Yes    | Yes                                                                                                                              | Yes                       | Yes.                      | Bilateral disc edema was also present. | NA                                            | Yes (Dense)                               | Yes                           | Yes |
| <b>Hearing loss</b>         | No         | No     | No                                                                                                                               | Yes                       | NE                        | NA                                     | Yes Significant in both ears, no hearing aids | Yes. (60% hearing loss. Used hearing aids | NE                            |     |
| <b>Macroglossia</b>         | Yes        | No     | No                                                                                                                               | No                        | No                        | NA                                     | Yes. Causes speech impairment                 | No                                        | No                            |     |
| <b>Respiratory function</b> | NE         | Normal | Normal                                                                                                                           | NE                        | Affected. Noisy breathing | NA                                     | Affected. Noisy breathing and snoring         | Affected                                  | Normal                        |     |
| <b>Sleep Disturbance</b>    | NE         | NE     | Mild                                                                                                                             | NE                        | Yes. Has snoring          | NA                                     | No                                            | Yes. Had snoring                          | Mild obstructive sleep apnoea |     |

| Particulars                      | Patient ID     |             |                                                                   |                                                                           |                 |                 |                 |                           |        |
|----------------------------------|----------------|-------------|-------------------------------------------------------------------|---------------------------------------------------------------------------|-----------------|-----------------|-----------------|---------------------------|--------|
|                                  | P1             | P2          | P3                                                                | P5                                                                        | P6              | P7 <sup>1</sup> | P8              | P9                        | P10    |
| <b>Skeletal Involvement</b>      |                |             |                                                                   |                                                                           |                 |                 |                 |                           |        |
| <b>Pectus carinatum</b>          | Yes            | Yes         | Yes                                                               | Yes                                                                       | Yes             | NA              | Yes             | Yes                       | Yes    |
| <b>Cervical spine defects</b>    | NE             | No          | Cervical canal narrowing, prominent at cervico-medullary junction | Atlanto-axial dislocation, mild compression of spinal cord at C1/C2 level | NE              | NA              | NE              | No                        | No     |
| <b>Thoraco-lumbar spine</b>      | Mild scoliosis | Mild gibbus | Mild scoliosis                                                    | Kyphosis                                                                  | Kypho-scoliosis | NA              | Lumbar lordosis | Kyphosis, lumbar lordosis | Normal |
| <b>Stiff upper limbs</b>         | Yes            | No          | Yes                                                               | No                                                                        | Yes             | NA              | Yes             | No                        | No     |
| <b>Claw hands</b>                | Yes            | Yes         | Yes                                                               | Yes                                                                       | No              | NA              | No              | Yes                       | Yes    |
| <b>Carpal tunnel syndrome</b>    | No             | No          | Yes                                                               | No                                                                        | No              | NA              | No              | Yes                       | No     |
| <b>Brachydactyly</b>             | Yes            | Yes         | Yes                                                               | Yes (Mild)                                                                | Yes             | NA              | Yes             | Yes                       | Yes    |
| <b>Bent knee</b>                 | Yes            | No          | No                                                                | Yes                                                                       | Mild            | NA              | Yes             | Yes                       | No     |
| <b>Restricted joint mobility</b> | Yes            | Mild        | Yes                                                               | Yes                                                                       | Yes             | NA              | No              | Yes                       | Mild   |

| Particulars                         | Patient ID |                             |                                     |                   |                   |                 |                     |                     |                   |
|-------------------------------------|------------|-----------------------------|-------------------------------------|-------------------|-------------------|-----------------|---------------------|---------------------|-------------------|
|                                     | P1         | P2                          | P3                                  | P5                | P6                | P7 <sup>1</sup> | P8                  | P9                  | P10               |
| <b>Cardiovascular system</b>        |            |                             |                                     |                   |                   |                 |                     |                     |                   |
| <b>Valvular defects</b>             |            |                             |                                     |                   |                   |                 |                     |                     |                   |
| <b>Thickening of valve(s)</b>       | NE         | Mitral and tricuspid valves | Aortic, mitral and tricuspid valves | Aortic valve      | No                | NA              | No                  | Mitral valve        | No                |
| <b>Mitral regurgitation</b>         | NE         | Yes                         | Yes                                 | Yes               | No                | NA              | Yes                 | Yes                 | No                |
| <b>Tricuspid regurgitation</b>      | NE         | Yes                         | Yes                                 | No                | No                | NA              | No                  | No                  | No                |
| <b>Mitral stenosis</b>              | NE         | No                          | No                                  | No                | No                | NA              | No                  | No                  | No                |
| <b>Mitral valve prolapse</b>        | No         | No                          | No                                  | Yes               | No                | NA              | Yes                 | No                  | No                |
| <b>Left ventricular hypertrophy</b> | NE         | Mild                        | Yes                                 | No                | No                | NA              | No                  | Yes                 | No                |
| <b>Other features</b>               | None       | None                        | Pulmonary arterial hypertension     | None              | None              | NA              | None                | None                | None              |
| <b>Abdomen</b>                      |            |                             |                                     |                   |                   |                 |                     |                     |                   |
| <b>Umbilical hernia</b>             | Yes        | Yes                         | Yes                                 | Yes               | No                | NA              | Yes                 | No                  | Yes               |
| <b>Inguinal hernia</b>              | No         | No                          | No                                  | Yes               | No                | NA              | No                  | Yes                 | No                |
| <b>Organomegaly</b>                 | No         | No                          | No                                  | Mild Hepatomegaly | Mild Hepatomegaly | NA              | Hepato-splenomegaly | Hepato-splenomegaly | Mild hepatomegaly |

| Particulars                             | Patient ID |        |        |        |        |                 |            |        |        |
|-----------------------------------------|------------|--------|--------|--------|--------|-----------------|------------|--------|--------|
|                                         | P1         | P2     | P3     | P5     | P6     | P7 <sup>1</sup> | P8         | P9     | P10    |
| <b>General</b>                          |            |        |        |        |        |                 |            |        |        |
| <b>Independence in daily activities</b> | Yes        | Yes    | Yes    | Yes    | Yes    | NA              | Yes        | Yes    | Yes    |
| <b>Schooling</b>                        | Normal     | Normal | Normal | Normal | Normal | NA              | Never sent | Normal | Normal |

<sup>1</sup> Preclinical individual.

<sup>2</sup> Mutations were homozygous in all patients except P1, in whom mutation was found only in one allele.

Novel mutations are shown in bold.

NE – Not evaluated. NA – Not applicable. Patient P4 (from Family F4) is not a subject of this study.

Table S2.

Non-synonymous polymorphisms in patients.

| Family ID | Patient ID | Mutation <sup>1</sup> | Non-synonymous polymorphisms      |              |
|-----------|------------|-----------------------|-----------------------------------|--------------|
|           |            |                       | p.V358M                           | p.V376M      |
| F1        | P1         | p.W450C               | Heterozygous                      | Heterozygous |
| F2        | P2         | p.L98R                | -                                 | -            |
| F3        | P3         | p.W450C               | Homozygous                        | -            |
| F5        | P5         | p.D53N                | Homozygous                        | -            |
| F6        | P6         | p.R315P               | -                                 | -            |
|           | P7         | p.R315P               | -                                 | -            |
| F7        | P8         | p.R160Q               | -                                 | -            |
| F8        | P9         | p.C91R                | Sample from patient not available |              |
| F9        | P10        | p.G38_G40del3         | -                                 | Homozygous   |

<sup>1</sup> Mutations were homozygous in all patients except P1. In P1, one heterozygous mutation was found, and the second mutation was not found.

In P9, the mutation stated was inferred from genotype of parents. “-” indicates absence of polymorphism.

Table S3.

Variations of unknown significance (VUS) found in patients and control subjects.

| Type of VUS                                    | Total No.                  | Location                | VUS                   | NCBI SNP ID                | Patients | Controls |
|------------------------------------------------|----------------------------|-------------------------|-----------------------|----------------------------|----------|----------|
| Synonymous VUS and those in non-coding regions | 17                         | 5'UTR portion of Exon 1 | g.5109A>G             | <a href="#">rs163126</a>   | +        | NA       |
|                                                |                            |                         | g.5329A>G             | <a href="#">rs57586329</a> | +        | NA       |
|                                                |                            |                         | g.5381C>G             | <a href="#">rs62377914</a> | +        | NA       |
|                                                |                            |                         | g.5448insCA           | <a href="#">rs3075605</a>  | +        | NA       |
|                                                |                            |                         | g.5723A>G             | <a href="#">rs59558132</a> | +        | NA       |
|                                                |                            |                         | g.5985A>G             | <a href="#">rs163127</a>   | +        | NA       |
|                                                |                            | Intron 1                | g.6761G>T             | <a href="#">rs55953431</a> | +        | +        |
|                                                |                            |                         | g.6765G>A             | <a href="#">rs163128</a>   | +        | +        |
|                                                |                            |                         | g.22317T>C            | <a href="#">rs3733895</a>  | +        | -        |
|                                                |                            | Intron 3                | g.36011T>C            | <a href="#">rs6870443</a>  | +        | NA       |
|                                                |                            | Intron 5                | g.106089C>T           | <a href="#">rs79555942</a> | +        | +        |
|                                                |                            |                         | g.152082A>C           | <a href="#">rs25415</a>    | +        | -        |
|                                                |                            | Exon 6                  | g.152157G>A*          | <a href="#">rs25413</a>    | +        | NA       |
|                                                |                            | 3'UTR portion of Exon 8 | g.211198G>A           | <a href="#">rs2173012</a>  | +        | NA       |
|                                                |                            |                         | g.213160T>G           | <a href="#">rs7704939</a>  | +        | NA       |
|                                                |                            |                         | g.214113G>T           | <a href="#">rs3088247</a>  | +        | NA       |
| g.214319T>G                                    | <a href="#">rs11750774</a> |                         | +                     | NA                         |          |          |
| Non-synonymous                                 | 2                          | Exon 5                  | g.105881G>A (p.V358M) | <a href="#">rs1065757</a>  | +        | +        |
|                                                |                            |                         | g.105935G>A (p.V376M) | <a href="#">rs1071598</a>  | +        | +        |
| <b>Total</b>                                   | 19                         |                         |                       |                            |          |          |

No novel VUS were found.

\*Synonymous polymorphism.

“+” indicates presence and “-” indicates absence of the VUS. NA – Not analyzed.



Table S4.

Missense mutations known to occur at L98 and R315 of human ARSB.

| <b>Amino acid residue</b> | <b>Mutations known</b> | <b>Codon change</b>       | <b>Reference</b>     |
|---------------------------|------------------------|---------------------------|----------------------|
| <b>L98</b>                | p.L98Q                 | C <u>T</u> G>C <u>A</u> G | [15]                 |
|                           | p.L98P                 | C <u>T</u> G>C <u>C</u> G | [46] (Cited from 47) |
|                           | p.L98R                 | C <u>T</u> G>C <u>G</u> G | This study           |
| <b>R315</b>               | p.R315Q                | C <u>G</u> A>C <u>A</u> A | [48]                 |
|                           | p.R315P                | C <u>G</u> A>C <u>C</u> A | This study           |

The nucleotides mutated are underlined. Mutations found through this study are shaded.

Table S5.

Active site mutations known to date in human ARSB.

| S. No. | Mutation | Homozygosity/<br>Heterozygosity | Severity of phenotype <sup>1</sup>                                                                                                                         | Ethnicity of patient <sup>1</sup> | Original reference for mutation                                      |
|--------|----------|---------------------------------|------------------------------------------------------------------------------------------------------------------------------------------------------------|-----------------------------------|----------------------------------------------------------------------|
| 1      | p.D53N   | Homozygous                      | Not stated <sup>2</sup>                                                                                                                                    | Indian                            | [1]                                                                  |
| 2      | p.D54N   | Homozygous                      | Not stated. Patient was expected to have early onset and rapidly progressing disease based on high level of urinary GAG and no detectable activity of ARSB | Portugal                          | [15]                                                                 |
| 3      | p.C91Y   | Compound heterozygous           | Intermediate phenotype                                                                                                                                     | Polish                            | [45]                                                                 |
| 4      | p.C91R   | Homozygous                      | Severe                                                                                                                                                     | Indian                            | This study                                                           |
| 5      | p.R95Q   | Compound heterozygous           | Severe in one patient, mild in two patients                                                                                                                | Not known                         | Litjens et al. (1996) <i>Am. J. Hum. Genet.</i> <b>58</b> :1127-1134 |
| 6      | p.D300E  | Compound heterozygous           | Not stated                                                                                                                                                 | UK                                | [15]                                                                 |
| 7      | p.N301K  | Homozygous                      | Severe                                                                                                                                                     | Turkish                           | Brands et al. (2013) <i>Orphanet J. Rare Dis.</i> <b>8</b> :51       |

<sup>1</sup> Severity and ethnicity mentioned here are as reported in the original publication of the mutation.

<sup>2</sup> Disease severity for the patient with p.D53N mutation was not reported in original publication. In this study, the patient with this mutation had “moderate” disease severity.

**Fig. S1.** Chromatograms of mutations identified in MPS VI patients (P1–P3, P5–P8, and P10).

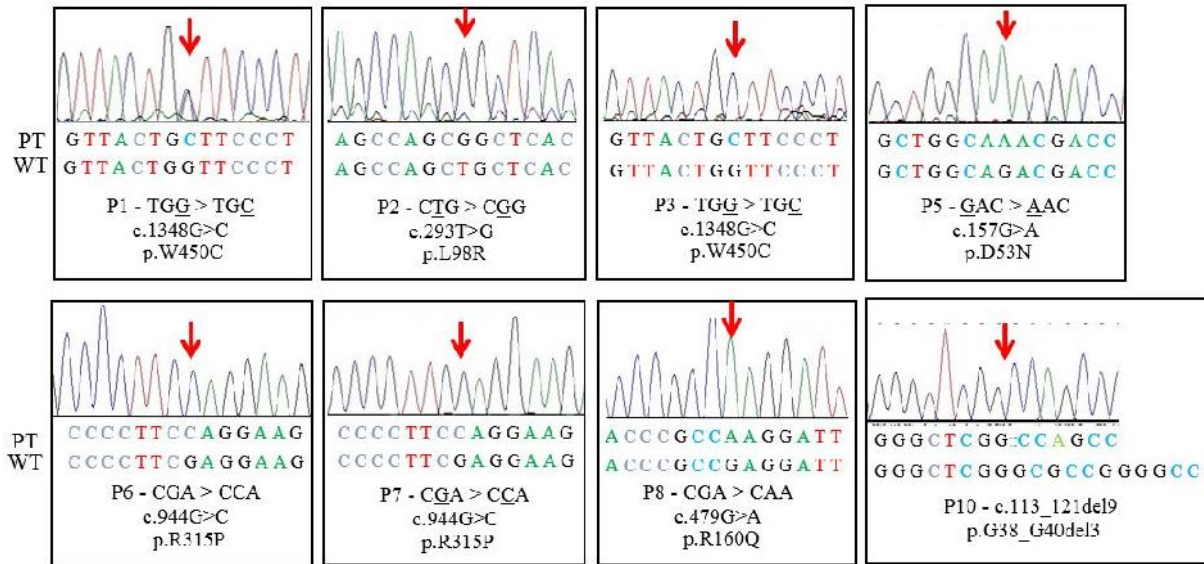

PT – Nucleotide sequence of *ARSB* from patients, WT – Nucleotide sequence of wild type *ARSB*. Red arrows indicate differences in nucleotides.

**Fig. S2.** Chromatograms of samples from parents of MPS VI patients.

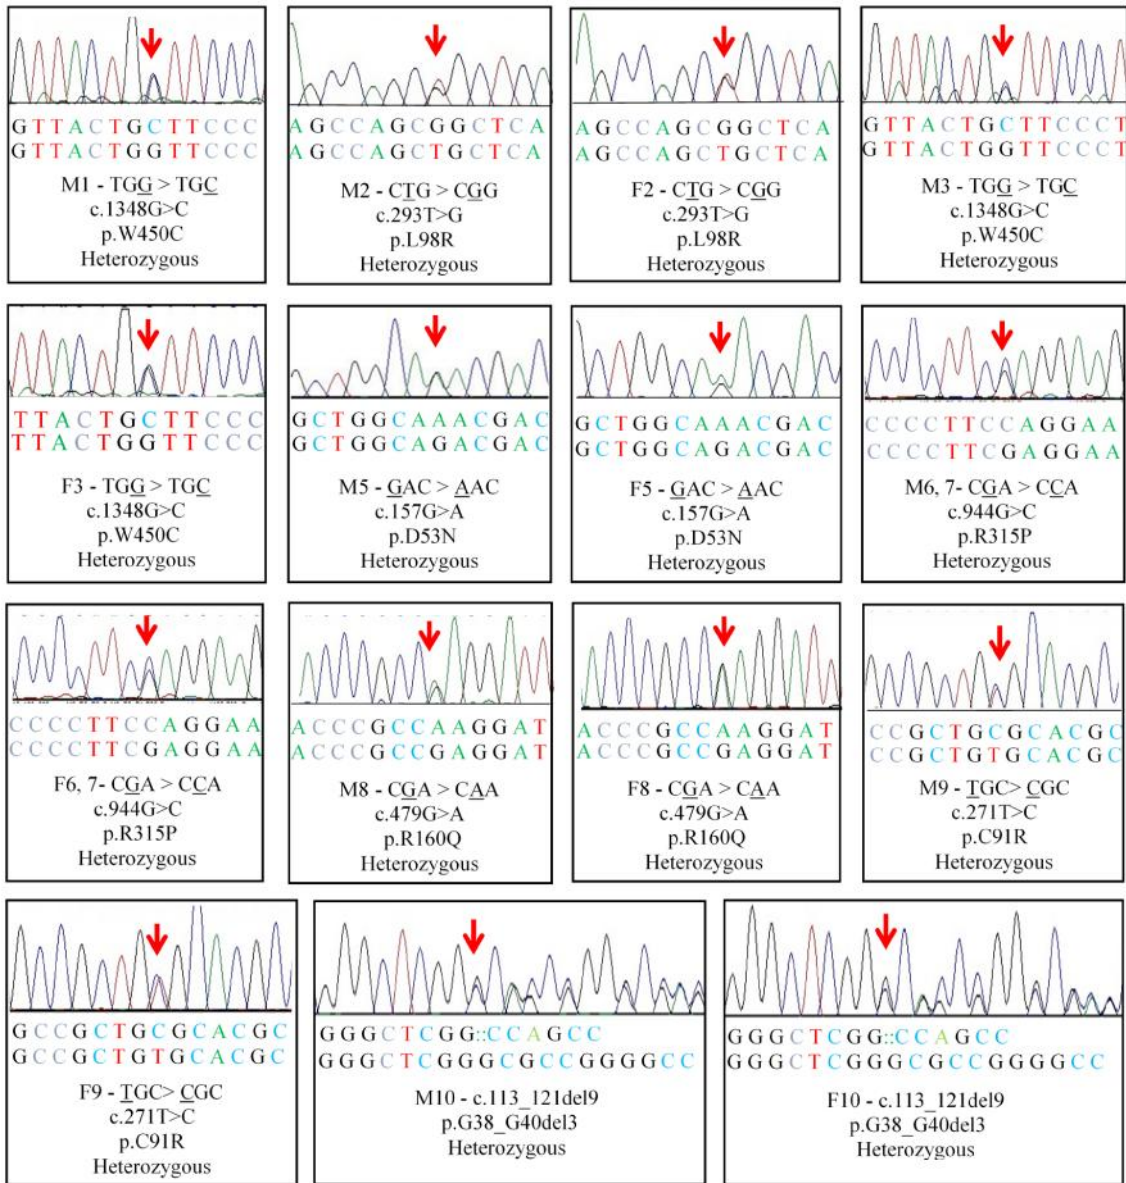

M indicates sample from mother, F, sample from father.

**Fig. S3.** A representation of the p.G38\_G40del13 mutation.

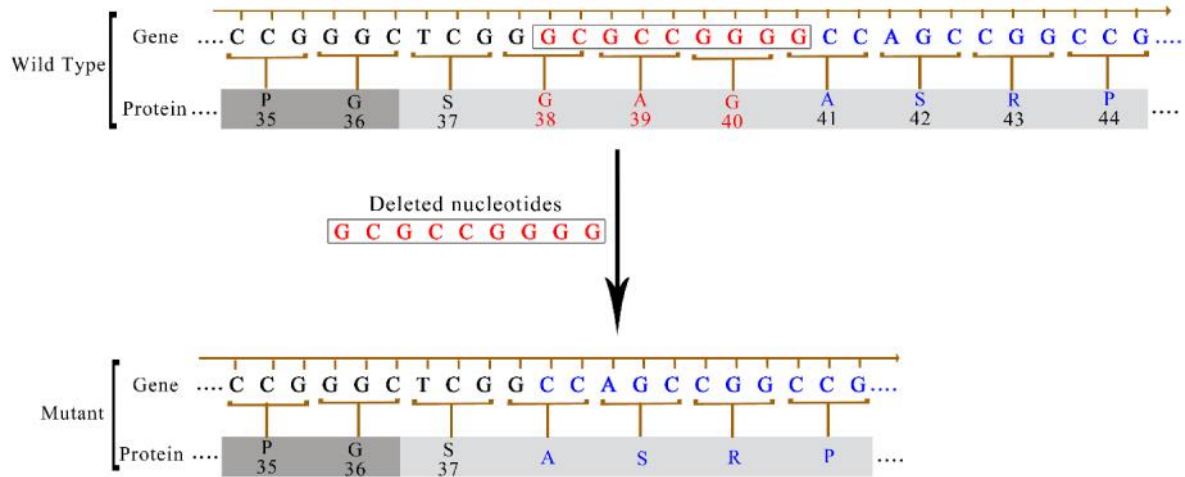

Deleted nucleotides and corresponding amino acid residues are shown in red. The region before the deletion is shown in black and that after the deletion in blue. Amino acid residues that correspond to the signal peptide are shaded in dark gray in the precursor. Amino acid residues that correspond to the mature protein are shaded in light gray. The position of each amino acid residue in the precursor is indicated below the residue.
